# Supplementary material
Source: PubMed Central journal article supplement (PMC3436956)
Supplement: NIHMS396922-supplement-1.pdf [file NIHMS396922-supplement-1.pdf]

Supplementary:

Table I. Primers for real-time PCR

| Genes         | Forward                | Reverse                |
|---------------|------------------------|------------------------|
| Arginase I    | CAGAAGAATGGAAGAGTCAG   | CAGATATGCAGGGAGTCACC   |
| iNOS          | AATAGAGGAACATCTGGCCAGG | ATGGCCGACCTGATGTTGC    |
| IL-10         | AGTGGAGCAGGTGAAGAGTG   | TTCGGAGAGAGGTACAAACG   |
| IL-12         | GTTCGAATCCAGCGCAAGAA   | AGACATTCCCGCCTTTGCA    |
| IL-6          | GAGAAAAGAGTTGTGCAATGGC | CCAGTTTGGTAGCATCCATCAT |
| TNF- $\alpha$ | TGTAGCCCACGTCGTAGCAAA  | CTGGCACCACCTAGTTGGTTGT |
| TGF- $\beta$  | TGCTAATGGTGGACCGCAA    | CACTGCTTCCCGAATGTCTGA  |
| IFN- $\gamma$ | GCAACAGCAAGGCGAAAAA    | GAAGACCATTCCCGACAAAA   |
| VEGF          | TTACTGCTGTACCTCCACC    | ACAGGACGGCTTGAAGATG    |

## Supplemental Figure 1

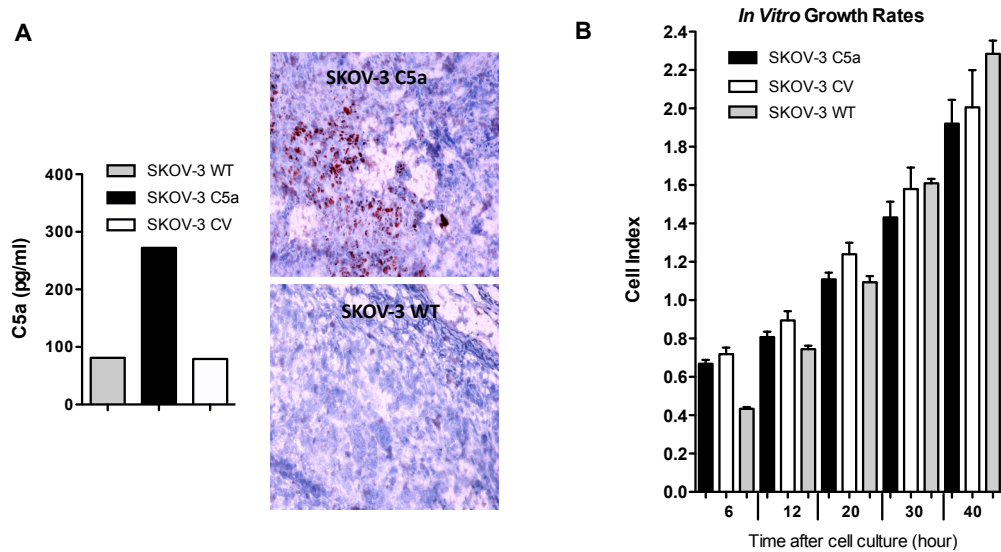

**Figure S1. C5a expression by transfected SKOV-3 cells and *in vitro*.** (A) C5a levels of SKOV-3 cells by ELISA from SKOV-3 wildtype (WT), SKOV-3 C5a or SKOV-3 CV cells. Staining of tumor tissue sections following *in vivo* passage by IHC revealed expression of C5a (brown) in SKOV-3 C5a tumor but not in SKOV-3 WT tumor. Magnification: 20x. (B) *In vitro* SKOV-3 cell growth at different timepoints as indicated.

Supplemental Figure 2

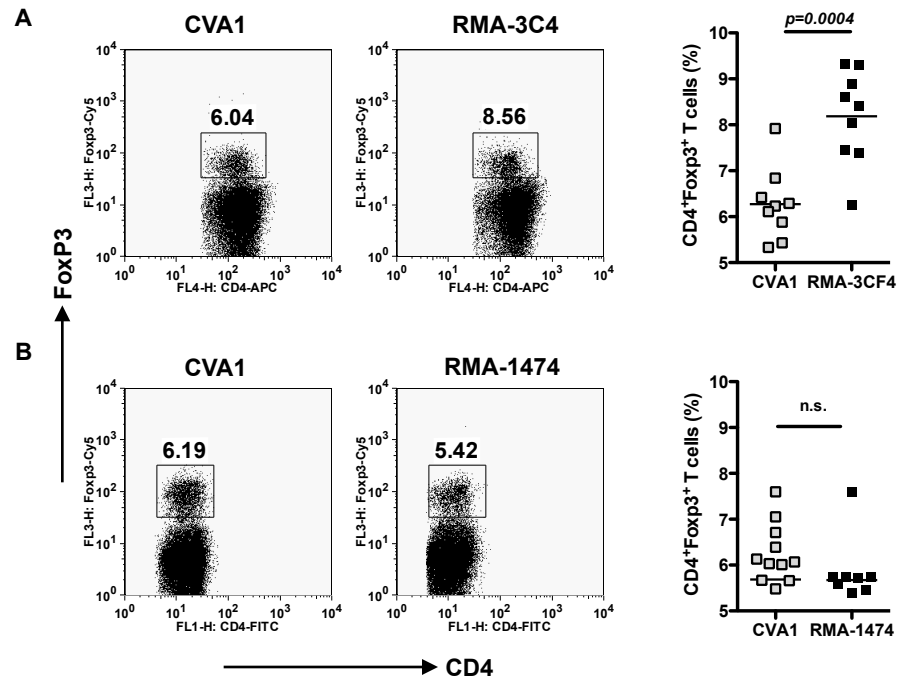

**Figure S2. Splenic Treg infiltration in tumor-bearing mice.** (A) Splens from C5a-high expressing lymphoma RMA-3CF4 or RMA CVA1 were stained for CD4 and Foxp3. Representative dot plots (cells were gated on the CD4<sup>+</sup> T cells) and summarized data are shown. (B) Splens from C5a-low expressing lymphoma RMA-1474 or RMA CVA1 were stained for CD4 and Foxp3. Representative dot plots (cells were gated on the CD4<sup>+</sup> T cells) and summarized data are shown.
